# Supplementary material
Source: PubMed Central journal article supplement (PMC2705522)
Supplement: 0809806106_0809806106SI.pdf [file 0809806106_0809806106SI.pdf]

# Supporting Information

Pluth et al. 10.1073/pnas.0809806106

## SI Text

**Calculations on Models Systems.** To test the feasibility of using the G3MP2 and G3 methods in the study of proton-bound homodimers, the analogous calculations were performed on the model complexes of ammonia, methylamine, dimethyl amine, and trimethyl amine and compared with known experimental values (1). Using geometry optimizations performed at the B3LYP/6-31++G(d,p) level of theory, the energy calculations were performed by using the B3LYP/6-31++G(d,p), G3(MP2), and G3 methods. The calculated proton affinities for this family of molecules are shown in Table S1 and agree with the experimentally determined values (2). Having demonstrated the validity of these computational methods in accurately calculating

the proton affinity of the model compounds, the enthalpy of the hydrogen bond formed between the protonated amine and water ( $[B\cdots H\cdots OH_2]^+$ ) and between the protonated amine and a second amine molecule ( $[B\cdots H\cdots B]^+$ ) were calculated. The calculated hydrogen bond enthalpies agree well with known values (1, 2) for both the  $[B\cdots H\cdots OH_2]^+$  and  $[B\cdots H\cdots B]^+$  complexes (Table S6). As is expected based on published analysis of the accuracy of B3LYP calculations, the deviation of the B3LYP energies from experimentally determined values increases (3) as the number of bonds in the molecule increases. In comparison, the G3MP2 and G3 energies were in good agreement with experimentally determined values for each compound investigated.

1. Mautner M (2005) The ionic hydrogen bond. *Chem Rev* 105:213–284.

2. Meot-Ner (Mautner) ML, Lia SG (2001) Binding energies between ions and molecules, and the thermochemistry of cluster ions. *NIST Chemistry Webbook*, eds Linstrom PJ, Mallard WG (NIST Standard Reference Database Number 69; National Institute of Standards and Technology, Gaithersburg, MD) accessible at <http://webbook.nist.gov>.

3. Redfern PC, Zapol P, Curtiss LA, Raghavachari K (2000) Assessment of Gaussian-3 and density functional theories for enthalpies of formation of C<sub>1</sub>-C<sub>16</sub> alkanes. *J Phys Chem A* 104:5850–5854.

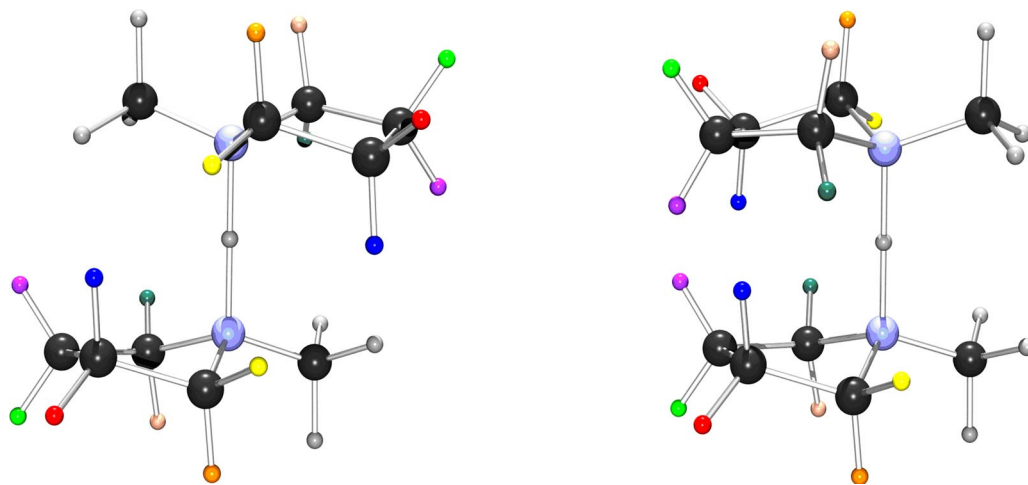

**Fig. S1.** Symmetry of encapsulated homodimers. Two conformations of the proton-bound homodimer of *N*-methylpyrrolidine. The  $C_{2v}$  (Left) and  $C_{2h}$  (Right) conformation of the proton-bound homodimer of *N*-methylpyrrolidine. The hydrogens are color-coded to show equivalent hydrogens upon encapsulation in 1.

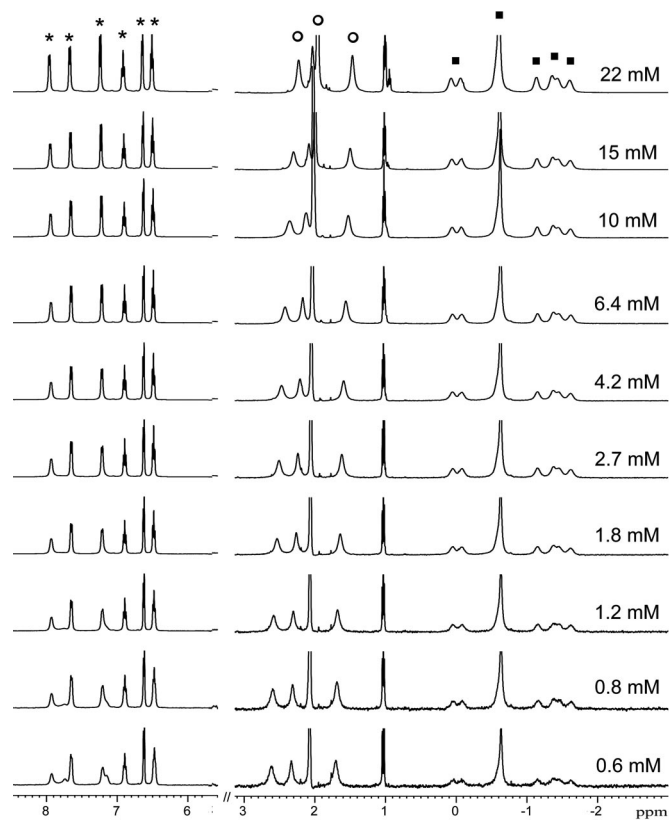

**Fig. S2.** Dilution <sup>1</sup>H NMR experiments of *N*-methylpyrrolidine and **1**. The resonances corresponding to the assembly (\*), external *N*-methylpyrrolidine (○), and encapsulated *N*-methylpyrrolidine (■) are labeled for clarity. The guest region of the spectra (3 to -3 ppm) has been enlarged 4 times for clarity.

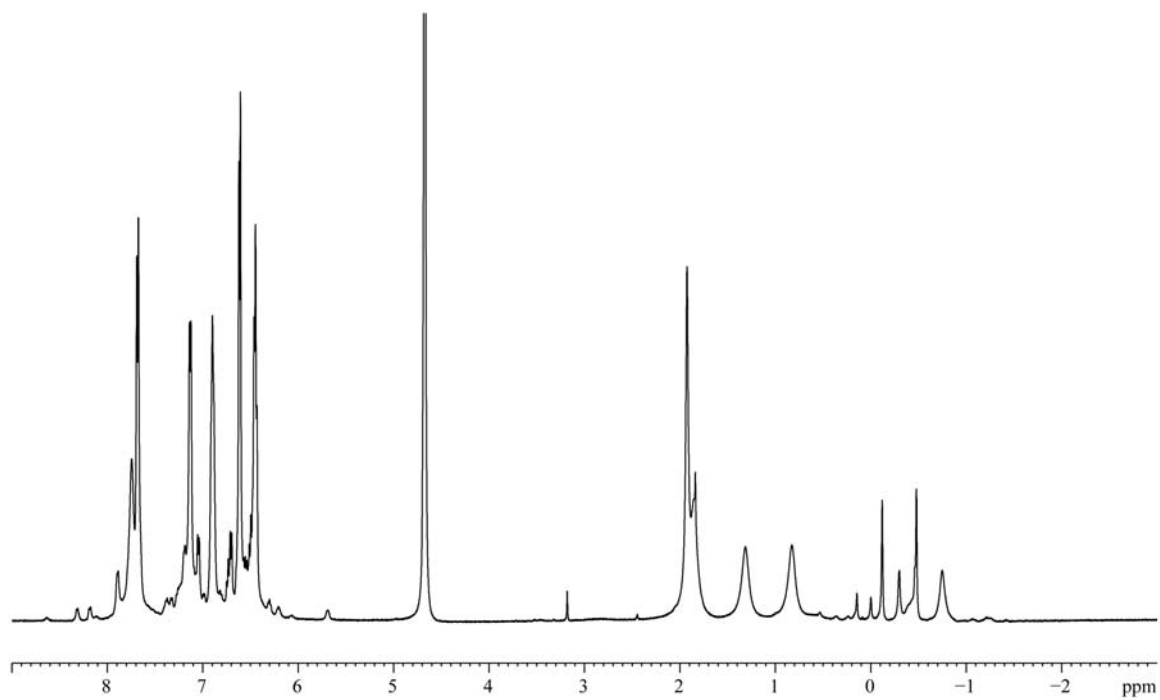

Fig. S3.  $^1\text{H}$  NMR spectrum of 2 equivalents of *N*-methylaziridine in 1.

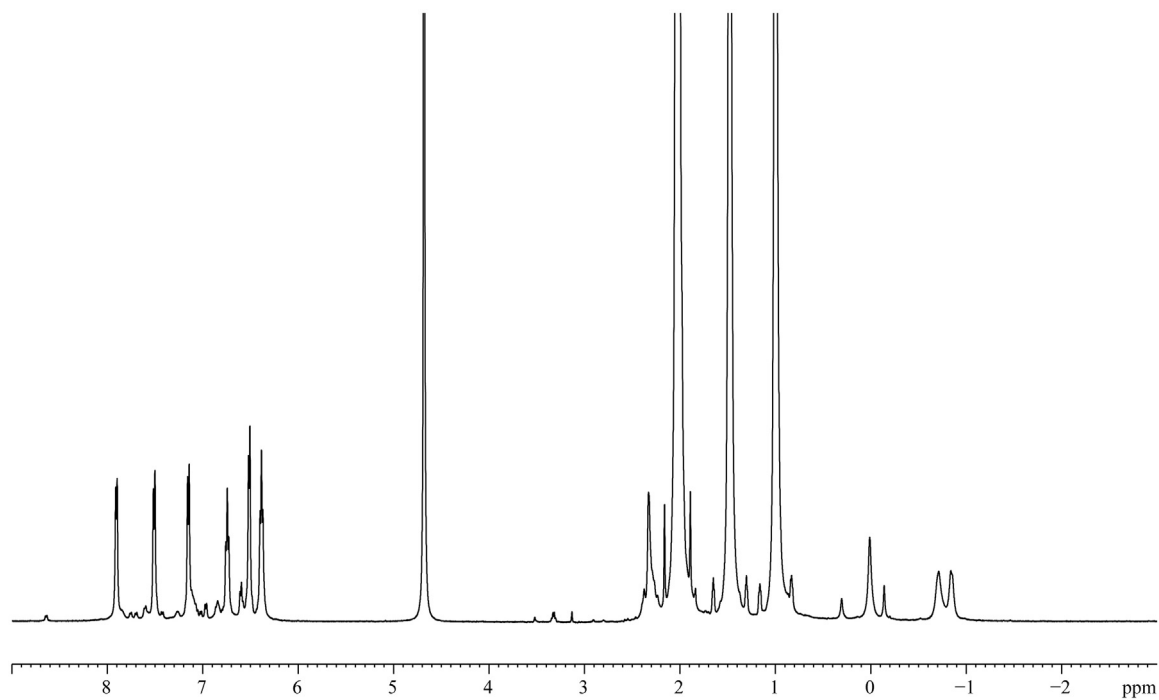

Fig. S4.  $^1\text{H}$  NMR spectrum of 3 equivalents of *N*-methylaziridine in 1.

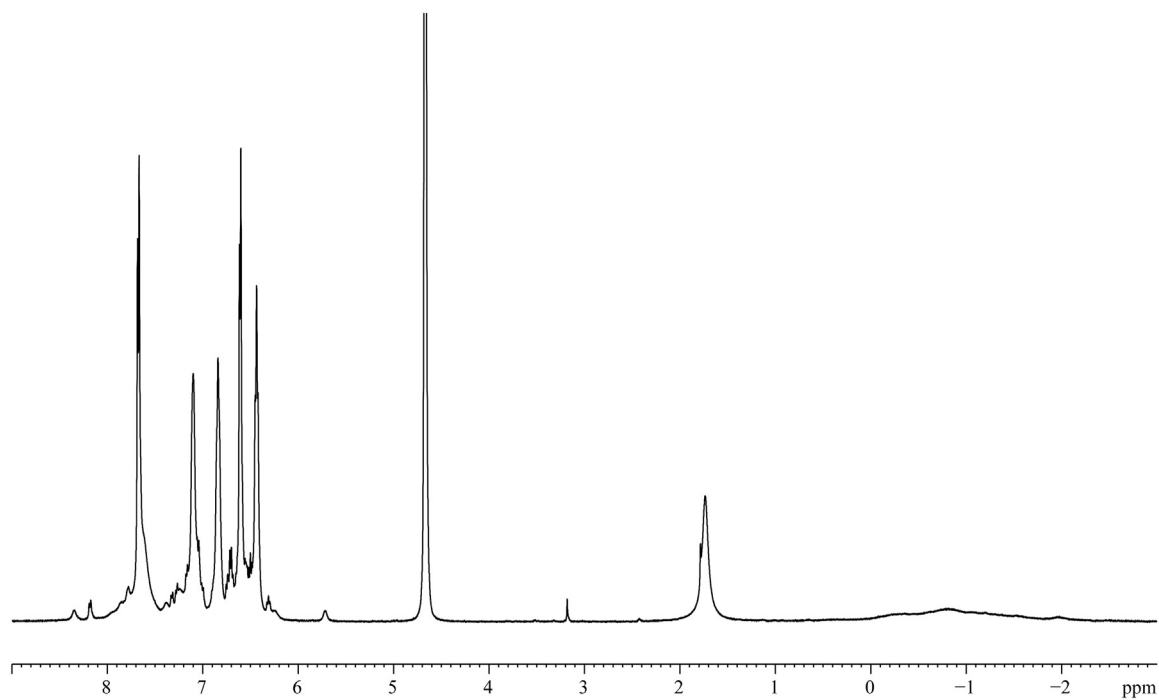

Fig. S5.  $^1\text{H}$  NMR spectrum of 1 equivalent of *N*-methylazetidine in 1.

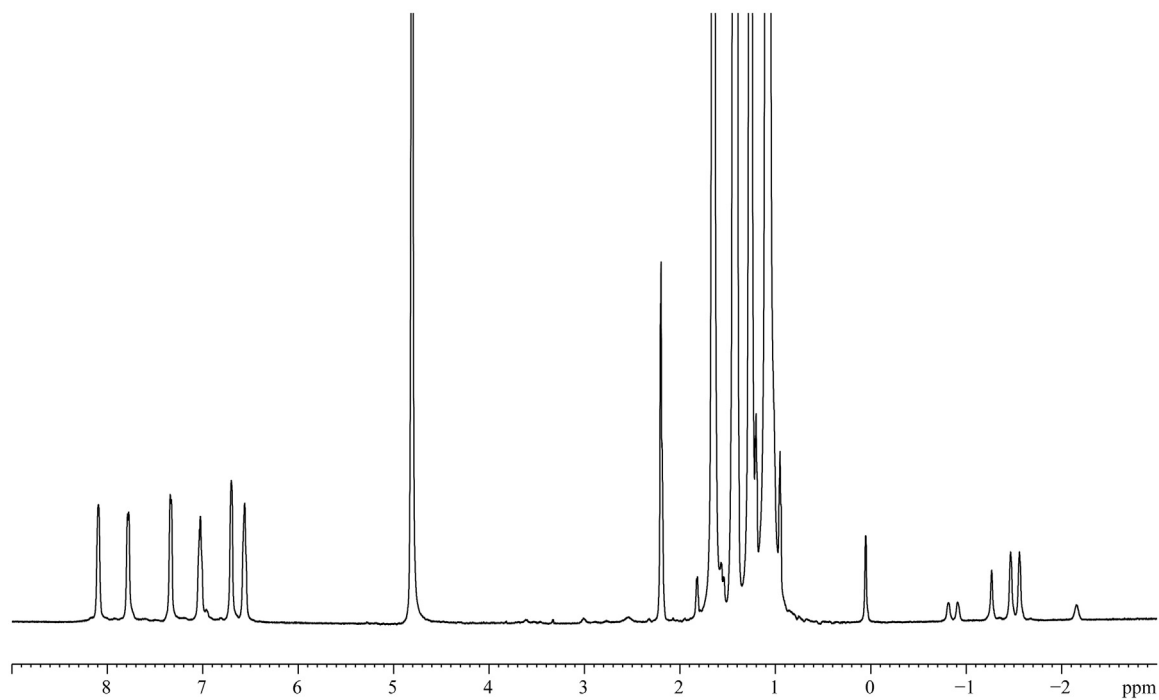

Fig. S6.  $^1\text{H}$  NMR spectrum of 2 equivalents of *N*-isopropylaziridine in **1**.

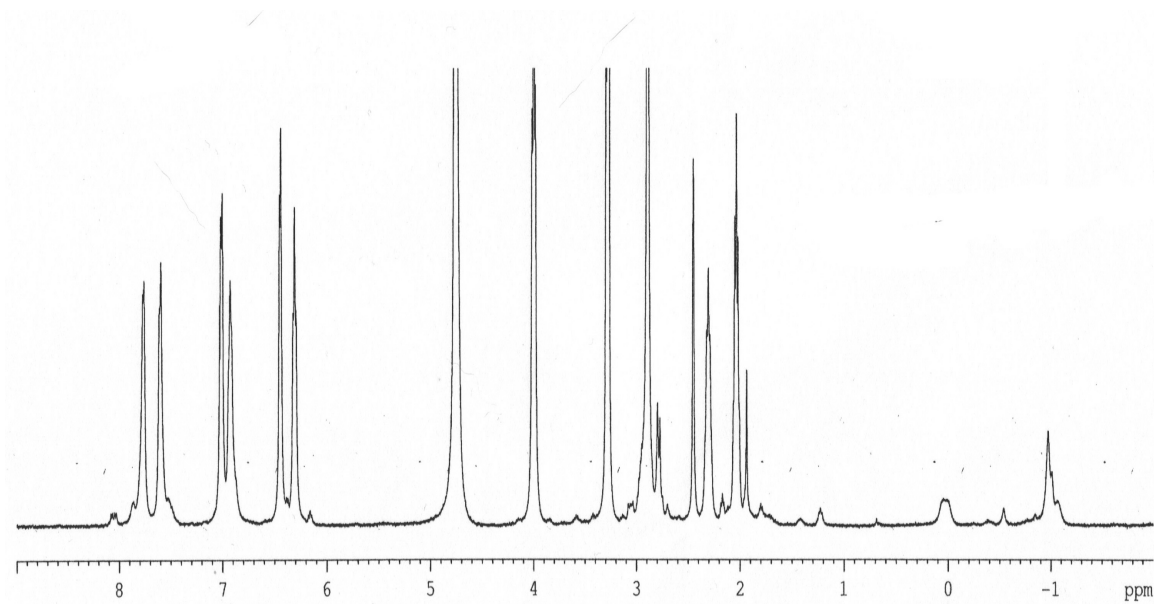

Fig. 57.  $^1\text{H}$  NMR spectrum of 1 equivalent of *N*-methylazetidine in 1.



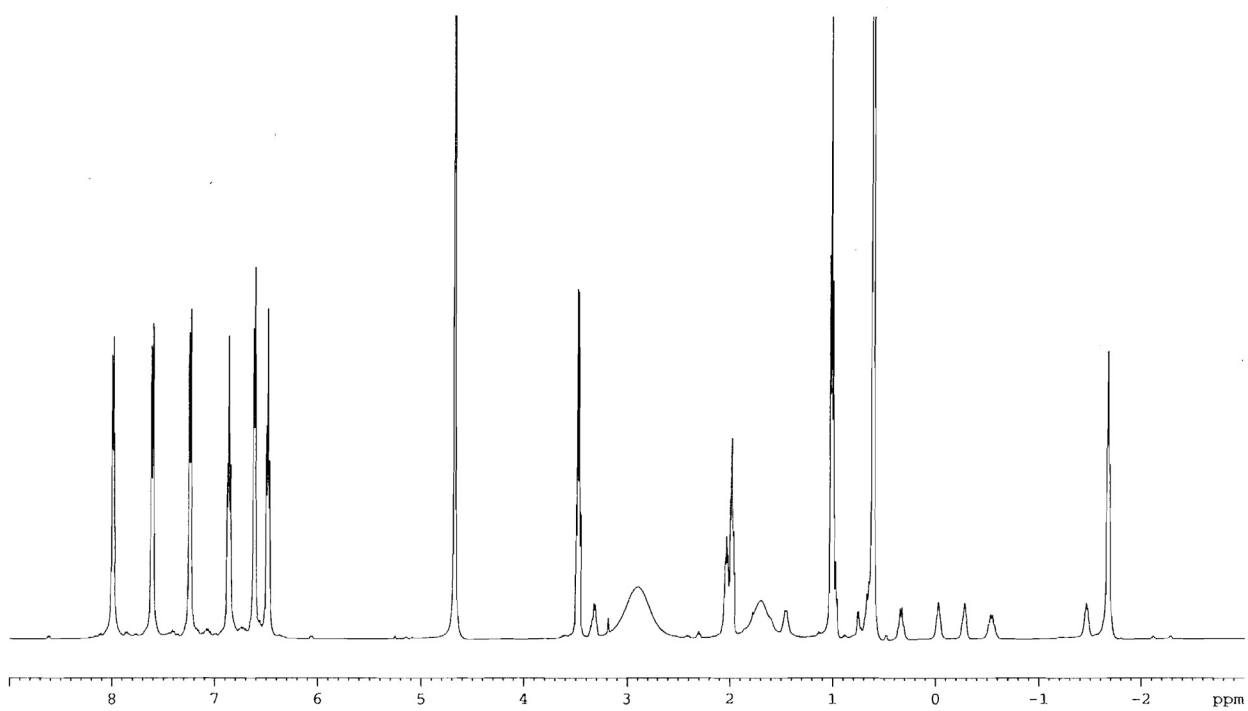

Fig. S8.  $^1\text{H}$  NMR spectrum of 2 equivalents of *N*-isopropylazetidone in 1.

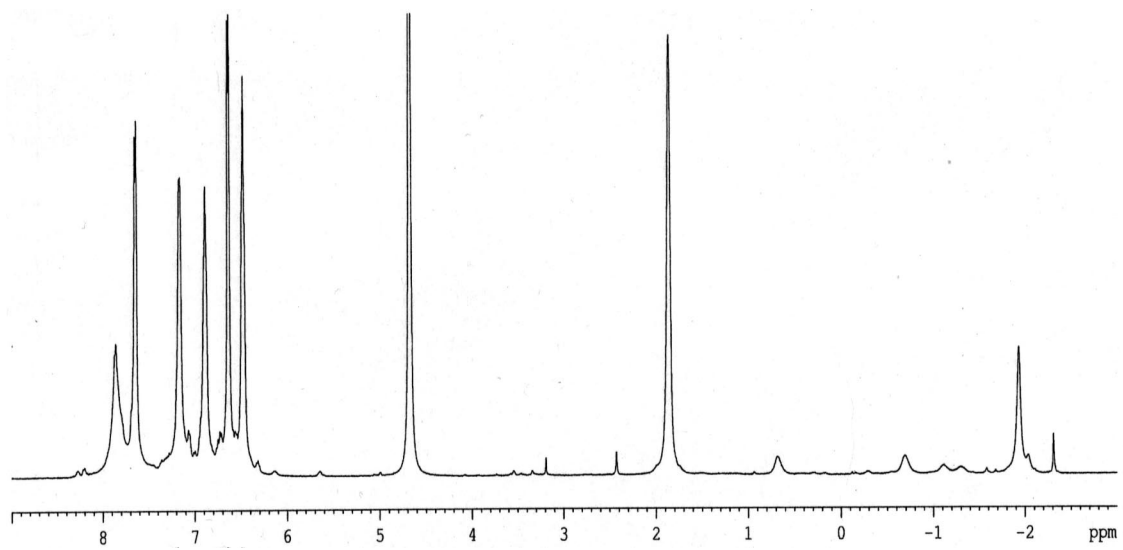

Fig. S9.  $^1\text{H}$  NMR spectrum of 2 equivalents of *N*-tertbutylazetidinium in 1.



**Table S1. Calculated volumes of [B··H··OH<sub>2</sub>]<sup>+</sup> and [B··H··B]<sup>+</sup> complexes**

| Compound                               | Volume, Å <sup>3</sup> | Compound                 | Volume, Å <sup>3</sup> |
|----------------------------------------|------------------------|--------------------------|------------------------|
| [2··H··OH <sub>2</sub> ] <sup>+</sup>  | 80                     | [2··H··2] <sup>+</sup>   | 123                    |
| [3··H··OH <sub>2</sub> ] <sup>+</sup>  | 95                     | [3··H··3] <sup>+</sup>   | 153                    |
| [4··H··OH <sub>2</sub> ] <sup>+</sup>  | 109                    | [4··H··4] <sup>+</sup>   | 182                    |
| [5··H··OH <sub>2</sub> ] <sup>+</sup>  | 125                    | [5··H··5] <sup>+</sup>   | 212                    |
| [6··H··OH <sub>2</sub> ] <sup>+</sup>  | 93                     | [6··H··6] <sup>+</sup>   | 150                    |
| [7··H··OH <sub>2</sub> ] <sup>+</sup>  | 108                    | [7··H··7] <sup>+</sup>   | 179                    |
| [8··H··OH <sub>2</sub> ] <sup>+</sup>  | 124                    | [8··H··8] <sup>+</sup>   | 210                    |
| [9··H··OH <sub>2</sub> ] <sup>+</sup>  | 125                    | [9··H··9] <sup>+</sup>   | 240                    |
| [10··H··OH <sub>2</sub> ] <sup>+</sup> | 107                    | [10··H··10] <sup>+</sup> | 176                    |
| [14··H··OH <sub>2</sub> ] <sup>+</sup> | 121                    | [14··H··14] <sup>+</sup> | 204                    |

Table S2. Comparison of the calculated and experimentally known proton affinities

| Substrate          | Proton affinity, kcal/mol |       |       | Exp.  |
|--------------------|---------------------------|-------|-------|-------|
|                    | B3LYP                     | G3MP2 | G3    |       |
| NH <sub>3</sub>    | 203.1                     | 202.9 | 203.1 | 204.0 |
| MeNH <sub>2</sub>  | 213.9                     | 213.9 | 214.0 | 214.9 |
| Me <sub>2</sub> NH | 220.7                     | 221.1 | 221.2 | 222.2 |
| Me <sub>3</sub> N  | 224.9                     | 225.7 | 225.7 | 226.8 |

Table S3. Comparison of calculated and known experimental values for hydrogen bond enthalpies in  $[B \cdots H \cdots OH_2]^+$  and  $[B \cdots H \cdots B]^+$ 

| Substrate          | $\Delta H [B \cdots H \cdots OH_2]^+$ , kcal/mol |       |      |      | $\Delta H [B \cdots H \cdots B]^+$ , kcal/mol |       |      |      |
|--------------------|--------------------------------------------------|-------|------|------|-----------------------------------------------|-------|------|------|
|                    | B3LYP                                            | G3MP2 | G3   | Exp. | B3LYP                                         | G3MP2 | G3   | Exp. |
| NH <sub>3</sub>    | 20.4                                             | 18.3  | 18.7 | 20.2 | 27.9                                          | 24.0  | 24.7 | 25.2 |
| MeNH <sub>2</sub>  | 17.9                                             | 16.5  | 17.0 | 17.8 | 25.9                                          | 24.0  | 24.5 | 23.6 |
| Me <sub>2</sub> NH | 16.2                                             | 15.4  | 15.9 | 15.0 | 23.0                                          | 23.9  | 24.3 | 22.5 |
| Me <sub>3</sub> N  | 15.1                                             | 14.9  | 15.4 | 14.5 | 19.8                                          | 23.7  | 24.3 | 22.2 |



Table S5. Calculated raw energies for [B·H·OH<sub>2</sub>]<sup>+</sup> complexes for model amines

| Substrate          | Energy of [B·H·OH <sub>2</sub> ] <sup>+</sup> , hartrees |             |             |
|--------------------|----------------------------------------------------------|-------------|-------------|
|                    | B3LYP                                                    | B3LYP       | B3LYP       |
| NH <sub>3</sub>    | -133.301827                                              | -133.171026 | -133.245677 |
| MeNH <sub>2</sub>  | -172.590269                                              | -172.404252 | -172.514576 |
| Me <sub>2</sub> NH | -211.879611                                              | -211.640307 | -211.786325 |
| Me <sub>3</sub> N  | -251.168426                                              | -250.878529 | -251.060216 |



Table S6. Calculated raw energies for [B·H·B]<sup>+</sup> complexes for model amines

| Substrate          | Δ Energy of [B·H·B] <sup>+</sup> , hartrees |             |             |
|--------------------|---------------------------------------------|-------------|-------------|
|                    | B3LYP                                       | G3MP2       | G3          |
| NH <sub>3</sub>    | -113.433622                                 | -113.307799 | -113.379911 |
| MeNH <sub>2</sub>  | -191.998057                                 | -191.762195 | -191.905741 |
| Me <sub>2</sub> NH | -270.566565                                 | -270.226092 | -270.440989 |
| Me <sub>3</sub> N  | -349.135987                                 | -348.696711 |             |

**Table S7. Calculated raw energies for cyclic amines**

| Substrate | B3LYP, hartrees |             | G3MP2, hartrees |             | G3, hartrees |             |
|-----------|-----------------|-------------|-----------------|-------------|--------------|-------------|
|           | Neutral         | Protonated  | Neutral         | Protonated  | Neutral      | Protonated  |
| 2         | -173.505371     | -173.150384 | -173.279971     | -172.926786 | -173.424649  | -173.071187 |
| 3         | -212.801463     | -212.442610 | -212.523529     | -212.166763 | -212.703695  | -212.346720 |
| 4         | -252.097301     | -251.735471 | -251.768814     | -251.409465 | -251.984512  | -251.625016 |
| 5         | -291.388412     | -291.021442 | -291.011679     | -290.647105 | -291.262973  | -290.898249 |
| 6         | -212.808310     | -212.445000 | -212.531367     | -212.168582 | -212.711473  | -212.348712 |
| 7         | -252.100343     | -251.736509 | -251.771469     | -251.408371 | -251.987051  | -251.624105 |
| 8         | -291.398586     | -291.028387 | -291.019650     | -290.650850 | -291.270764  | -290.902090 |
| 9         | -330.689121     | -330.315221 | -330.262260     | -329.889693 | -330.549007  | -330.176597 |
| 10        | -252.126398     | -251.761411 | -251.800097     | -251.435468 | -252.015620  | -251.651050 |
| 14        | -291.419354     | -291.056277 | -291.047576     | -290.680085 | -290.931228  | -290.564238 |

Table S8. Calculated raw energies for [B·H·OH<sub>2</sub>]<sup>+</sup> complexes for cyclic amines

| Substrate | Energy of [B·H·OH <sub>2</sub> ] <sup>+</sup> , hartrees |             |             |
|-----------|----------------------------------------------------------|-------------|-------------|
|           | B3LYP                                                    | G3MP2       | G3          |
| 2         | -249.943483                                              | -249.650066 | -249.833672 |
| 3         | -289.238114                                              | -288.892683 | -289.111795 |
| 4         | -328.532862                                              | -328.137340 | -328.392032 |
| 5         | -367.823002                                              | -367.379704 | -367.670004 |
| 6         | -289.244239                                              | -288.899900 | -289.119074 |
| 7         | -328.538409                                              | -328.142384 | -328.396935 |
| 8         | -367.829129                                              | -367.383552 | -367.673627 |
| 9         | -407.121601                                              | -406.628677 | -406.954438 |
| 10        | -328.561304                                              | -328.168100 | -328.422584 |
| 14        | -367.857603                                              | -367.414809 | -367.337163 |

Table S9. Calculated raw energies for [B·H·B]<sup>+</sup> complexes for cyclic amines

| Substrate | Energy of [B·H·B] <sup>+</sup> , hartrees |             |             |
|-----------|-------------------------------------------|-------------|-------------|
|           | B3LYP                                     | G3MP2       | G3          |
| 2         | -346.692624                               | -346.246475 | -346.536453 |
| 3         | -425.278547                               | -424.730523 | -425.091574 |
| 4         | -503.863769                               | -503.218394 | -503.650494 |
| 5         | -582.436972                               | -581.697703 | —           |
| 6         | -425.285390                               | -424.738598 | -425.099670 |
| 7         | -503.866732                               | -503.219863 | -503.570702 |
| 8         | -582.445861                               | -581.702005 | —           |
| 9         | -661.022700                               | -660.185955 | —           |
| 10        | -503.916075                               | -503.274407 | —           |
| 14        | -582.501997                               | —           | —           |

Table S10. Calculated Cartesian coordinates for *N*-methylaziridine

| Atom | x        | y        | z        | Atom | X        | y        | z       |
|------|----------|----------|----------|------|----------|----------|---------|
| C    | 0.00000  | 0.00000  | 0.00000  | N    | 0.74696  | -0.38291 | 1.19616 |
| C    | 1.49393  | 0.00000  | 0.00000  | C    | 0.74695  | 0.58201  | 2.29067 |
| H    | -0.49746 | 0.97093  | 0.00000  | H    | -0.14067 | 0.42193  | 2.91119 |
| H    | -0.55286 | -0.79747 | -0.49021 | H    | 1.63453  | 0.42190  | 2.91124 |
| H    | 1.99139  | 0.97093  | 0.00000  | H    | 0.74698  | 1.63229  | 1.94721 |
| H    | 2.04679  | -0.79747 | -0.49021 |      |          |          |         |

Table S11. Calculated Cartesian coordinates for H<sup>+</sup>-*N*-methylaziridine

| Atom | x        | y        | z        | Atom | X        | y        | z       |
|------|----------|----------|----------|------|----------|----------|---------|
| C    | 0.00000  | 0.00000  | 0.00000  | H    | 0.74079  | -1.24758 | 1.56896 |
| C    | 1.48158  | 0.00000  | 0.00000  | N    | 0.74079  | -0.27174 | 1.27362 |
| H    | -0.53387 | 0.94448  | 0.00000  | C    | 0.74078  | 0.69363  | 2.40665 |
| H    | -0.53762 | -0.85342 | -0.39963 | H    | -0.15686 | 0.52910  | 3.00460 |
| H    | 2.01546  | 0.94447  | 0.00000  | H    | 1.63832  | 0.52898  | 3.00471 |
| H    | 2.01920  | -0.85342 | -0.39963 | H    | 0.74087  | 1.70709  | 2.00427 |

Table S12. Calculated Cartesian coordinates for *N*-ethylaziridine.

| Atom | <i>x</i> | <i>y</i> | <i>z</i> | Atom | <i>X</i> | <i>y</i> | <i>z</i> |
|------|----------|----------|----------|------|----------|----------|----------|
| C    | 1.16204  | 0.90058  | 0.18083  | C    | -0.82012 | -0.60000 | 0.20543  |
| C    | 1.65685  | -0.49756 | 0.00719  | H    | -1.00386 | -1.62420 | -0.14135 |
| H    | 0.85190  | 1.19618  | 1.18421  | H    | -0.63349 | -0.65570 | 1.29515  |
| H    | 1.55457  | 1.70730  | -0.43304 | C    | -2.04335 | 0.27189  | -0.06792 |
| H    | 1.67818  | -1.13085 | 0.89511  | H    | -2.25448 | 0.31053  | -1.14097 |
| H    | 2.41556  | -0.72812 | -0.73652 | H    | -2.92432 | -0.12771 | 0.44590  |
| N    | 0.35235  | -0.09919 | -0.51493 | H    | -1.88298 | 1.29739  | 0.28277  |

Table S13. Calculated Cartesian coordinates for H<sup>+</sup>-*N*-ethylaziridine

| Atom | x        | y        | z        | Atom | X        | y        | z        |
|------|----------|----------|----------|------|----------|----------|----------|
| C    | -1.24084 | 0.89533  | -0.22243 | H    | 1.06553  | -1.62676 | 0.13155  |
| C    | -1.70857 | -0.49891 | -0.03964 | H    | 0.68448  | -0.66662 | -1.30942 |
| H    | -0.89943 | 1.21683  | -1.20078 | C    | 2.09011  | 0.30110  | 0.05248  |
| H    | -1.60315 | 1.67626  | 0.43761  | H    | 2.30942  | 0.34968  | 1.12393  |
| H    | -1.70331 | -1.17708 | -0.88648 | H    | 2.97673  | -0.10187 | -0.44441 |
| H    | -2.40963 | -0.73274 | 0.75452  | H    | 1.92725  | 1.31512  | -0.32396 |
| N    | -0.34183 | -0.10960 | 0.42619  | H    | -0.24504 | -0.00575 | 1.43646  |
| C    | 0.90762  | -0.61084 | -0.24080 |      |          |          |          |



Table S14. Calculated Cartesian coordinates for *N*-isopropylaziridine

| Atom | x        | y        | z        | Atom | X        | y        | z       |
|------|----------|----------|----------|------|----------|----------|---------|
| C    | 0.00000  | 0.00000  | 0.00000  | C    | 2.01498  | 0.37115  | 3.14402 |
| C    | 1.49312  | 0.00000  | 0.00000  | H    | 2.91414  | 0.51802  | 2.53627 |
| H    | -0.49441 | 0.97252  | 0.00000  | H    | 2.04771  | 1.08191  | 3.97663 |
| H    | -0.55515 | -0.79453 | -0.49233 | H    | 2.04381  | -0.64469 | 3.55243 |
| H    | 1.98769  | 0.97244  | 0.00014  | C    | -0.52187 | 0.37086  | 3.14416 |
| H    | 2.04813  | -0.79460 | -0.49237 | H    | -0.55047 | -0.64500 | 3.55253 |
| N    | 0.74656  | -0.38535 | 1.19555  | H    | -0.55471 | 1.08159  | 3.97680 |
| C    | 0.74650  | 0.57214  | 2.31158  | H    | -1.42111 | 0.51755  | 2.53647 |
| H    | 0.74638  | 1.60933  | 1.92024  |      |          |          |         |

Table S15. Calculated Cartesian coordinates for H<sup>+</sup>-*N*-isopropylaziridine

| Atom | x        | y        | z        | Atom | X        | y        | z       |
|------|----------|----------|----------|------|----------|----------|---------|
| C    | 0.00000  | 0.00000  | 0.00000  | C    | 2.02171  | 0.48307  | 3.24176 |
| C    | 1.48262  | 0.00000  | 0.00000  | H    | 2.91841  | 0.62358  | 2.63119 |
| H    | -0.52905 | 0.94714  | 0.00000  | H    | 2.05510  | 1.21261  | 4.05498 |
| H    | -0.53957 | -0.84824 | -0.40740 | H    | 2.05270  | -0.51446 | 3.69361 |
| H    | 2.01154  | 0.94724  | 0.00019  | C    | -0.53999 | 0.48462  | 3.24053 |
| H    | 2.02249  | -0.84796 | -0.40759 | H    | -0.57265 | -0.51288 | 3.69235 |
| N    | 0.74144  | -0.27424 | 1.26756  | H    | -0.57322 | 1.21420  | 4.05372 |
| C    | 0.74135  | 0.69128  | 2.43757  | H    | -1.43599 | 0.62623  | 2.62917 |
| H    | 0.74219  | 1.68323  | 1.97279  | H    | 0.74145  | -1.25207 | 1.56040 |

**Table S16. Calculated Cartesian coordinates for *N*-tertbutylaziridine**

| Atom | x        | y        | z        | Atom | X        | y        | z       |
|------|----------|----------|----------|------|----------|----------|---------|
| C    | 0.00000  | 0.00000  | 0.00000  | H    | -0.55393 | 0.42630  | 4.18464 |
| C    | 1.49641  | 0.00000  | 0.00000  | H    | -1.41862 | 0.21728  | 2.65105 |
| H    | -0.49022 | 0.97286  | 0.00000  | C    | 0.74817  | 1.90291  | 2.25878 |
| H    | -0.55523 | -0.78451 | -0.50981 | H    | -0.14027 | 2.25920  | 1.72726 |
| H    | 1.98663  | 0.97287  | 0.00000  | H    | 0.74834  | 2.38067  | 3.24386 |
| H    | 2.05164  | -0.78445 | -0.50989 | H    | 1.63649  | 2.25914  | 1.72700 |
| N    | 0.74820  | -0.42362 | 1.17655  | C    | 2.00918  | -0.05825 | 3.20324 |
| C    | 0.74815  | 0.36894  | 2.43379  | H    | 2.04998  | 0.42635  | 4.18476 |
| C    | -0.51298 | -0.05826 | 3.20309  | H    | 2.01605  | -1.14282 | 3.34682 |
| H    | -0.51984 | -1.14283 | 3.34666  | H    | 2.91488  | 0.21731  | 2.65130 |

Table S17. Calculated Cartesian coordinates for H<sup>+</sup>-*N*-tertbutylaziridine

| Atom | x        | y        | z        | Atom | X        | y        | z       |
|------|----------|----------|----------|------|----------|----------|---------|
| C    | 0.00000  | 0.00000  | 0.00000  | H    | 1.63458  | 2.35849  | 1.65725 |
| C    | 1.48301  | 0.00000  | 0.00000  | C    | 2.01326  | 0.15263  | 3.30273 |
| H    | -0.52305 | 0.94857  | 0.00000  | H    | 2.91677  | 0.40288  | 2.73833 |
| H    | -0.54265 | -0.84211 | -0.41598 | H    | 2.05374  | 0.69123  | 4.25288 |
| H    | 2.00601  | 0.94858  | -0.00004 | H    | 2.02673  | -0.91812 | 3.53440 |
| H    | 2.02559  | -0.84212 | -0.41604 | H    | 0.74149  | -1.28970 | 1.50093 |
| N    | 0.74147  | -0.29822 | 1.26137  | C    | -0.53064 | 0.15263  | 3.30261 |
| C    | 0.74135  | 0.55634  | 2.54679  | H    | -0.54398 | -0.91806 | 3.53461 |
| C    | 0.74130  | 2.04764  | 2.20599  | H    | -0.57138 | 0.69148  | 4.25260 |
| H    | -0.15178 | 2.35827  | 1.65680  | H    | -1.43407 | 0.40256  | 2.73794 |
| H    | 0.74102  | 2.60330  | 3.14717  |      |          |          |         |

**Table S18. Calculated Cartesian coordinates for *N*-methylazetidine**

| Atom | x        | y        | z        | Atom | X        | y       | z        |
|------|----------|----------|----------|------|----------|---------|----------|
| C    | 0.00000  | 0.00000  | 0.00000  | H    | 0.06149  | 1.95739 | -1.02276 |
| C    | 1.54838  | 0.00000  | 0.00000  | H    | -0.53377 | 2.12342 | 0.65867  |
| C    | 0.12258  | 1.54352  | 0.00000  | N    | 1.51645  | 1.40079 | 0.47504  |
| H    | -0.50126 | -0.46303 | -0.85223 | C    | 2.51734  | 2.32534 | -0.01668 |
| H    | -0.41997 | -0.38794 | 0.93089  | H    | 2.30395  | 3.33368 | 0.35439  |
| H    | 1.95612  | -0.09366 | -1.02276 | H    | 3.50562  | 2.03279 | 0.35439  |
| H    | 2.07450  | -0.70020 | 0.65867  | H    | 2.56053  | 2.36525 | -1.12373 |

**Table S19. Calculated Cartesian coordinates for H<sup>+</sup>-*N*-methylazetidide**

| Atom | x        | y        | z        | Atom | X        | y       | z        |
|------|----------|----------|----------|------|----------|---------|----------|
| C    | 0.00000  | 0.00000  | 0.00000  | H    | -0.54709 | 2.09750 | 0.72438  |
| C    | 1.54412  | 0.00000  | 0.00000  | N    | 1.53897  | 1.48959 | 0.37990  |
| C    | 0.05034  | 1.54330  | 0.00000  | C    | 2.50101  | 2.42076 | -0.27781 |
| H    | -0.47769 | -0.46236 | -0.86327 | H    | 2.27030  | 3.44281 | 0.02836  |
| H    | -0.42872 | -0.41497 | 0.91408  | H    | 3.51500  | 2.15685 | 0.02836  |
| H    | 1.99454  | -0.10040 | -0.98868 | H    | 2.39894  | 2.32197 | -1.35907 |
| H    | 2.07855  | -0.61518 | 0.72438  | H    | 1.63456  | 1.58211 | 1.39486  |
| H    | -0.03532 | 1.99675  | -0.98868 |      |          |         |          |

Table S20. Calculated Cartesian coordinates for *N*-ethylazetidine

| Atom | x        | y        | z        | Atom | X        | y        | z        |
|------|----------|----------|----------|------|----------|----------|----------|
| C    | 1.24790  | 0.59350  | 0.25755  | H    | -0.46039 | -1.24068 | 1.21818  |
| H    | 1.16572  | 0.63140  | 1.36451  | H    | -0.47748 | -1.95138 | -0.42580 |
| C    | 2.39966  | -0.32909 | -0.13977 | H    | -1.18909 | 1.44757  | 0.95157  |
| H    | 2.52409  | -0.34317 | -1.22717 | H    | -1.46734 | 1.74229  | -0.79320 |
| H    | 3.33765  | 0.00606  | 0.31571  | H    | -2.78098 | -0.45684 | 0.76062  |
| H    | 2.21731  | -1.35687 | 0.19388  | H    | -2.49987 | -0.55572 | -1.00050 |
| C    | -0.67729 | -1.04306 | 0.15261  | N    | -0.00962 | 0.18322  | -0.34480 |
| C    | -1.22215 | 0.97744  | -0.04766 | H    | 1.45791  | 1.61656  | -0.07966 |
| C    | -2.04149 | -0.33574 | -0.03348 |      |          |          |          |

Table S21. Calculated Cartesian coordinates for H<sup>+</sup>-*N*-ethylazetidone

| Atom | x        | y        | z        | Atom | X        | y        | z        |
|------|----------|----------|----------|------|----------|----------|----------|
| C    | 1.44728  | -0.13809 | -0.62662 | H    | -0.34266 | -1.31267 | 1.09543  |
| H    | 1.77682  | 0.60104  | -1.36280 | H    | -1.21233 | -1.95470 | -0.33030 |
| C    | 2.05239  | 0.14144  | 0.74104  | H    | -0.29861 | 1.56205  | 0.66518  |
| H    | 1.72743  | -0.57090 | 1.50390  | H    | -1.15294 | 1.78659  | -0.89098 |
| H    | 3.13738  | 0.03890  | 0.65019  | H    | -2.26793 | 0.24093  | 1.44143  |
| H    | 1.85518  | 1.15782  | 1.09062  | H    | -2.80798 | -0.00308 | -0.23614 |
| C    | -0.91001 | -1.05265 | 0.20245  | N    | -0.06673 | -0.11138 | -0.66973 |
| C    | -0.87665 | 1.07091  | -0.11622 | H    | 1.72975  | -1.13054 | -0.99074 |
| C    | -1.93639 | 0.08147  | 0.41578  | H    | -0.33662 | -0.25426 | -1.64637 |



Table S22. Calculated Cartesian coordinates for *N*-isopropylazetidone

| Atom | x        | y        | z        | Atom | X        | y        | z       |
|------|----------|----------|----------|------|----------|----------|---------|
| C    | 0.00000  | 0.00000  | 0.00000  | C    | -0.00816 | -2.05526 | 1.48193 |
| H    | 1.11233  | 0.00000  | 0.00000  | C    | -0.00816 | -0.22931 | 2.52342 |
| C    | -0.47508 | 1.45659  | 0.00000  | C    | 0.00187  | -1.70448 | 2.98832 |
| H    | -0.12320 | 1.99533  | 0.88607  | H    | 1.01207  | -2.23709 | 1.09871 |
| H    | -0.09523 | 1.98314  | -0.88193 | H    | -0.66617 | -2.86047 | 1.13857 |
| H    | -1.56981 | 1.49962  | -0.01286 | H    | 1.01207  | 0.19311  | 2.48484 |
| C    | -0.47508 | -0.74149 | -1.25374 | H    | -0.66617 | 0.47614  | 3.04170 |
| H    | -1.56981 | -0.75232 | -1.29732 | H    | 0.86017  | -2.03883 | 3.57451 |
| H    | -0.09523 | -0.25042 | -2.15590 | H    | -0.92351 | -1.99221 | 3.49279 |
| H    | -0.12320 | -1.77841 | -1.26638 | N    | -0.48810 | -0.68183 | 1.19540 |

Table S23. Calculated Cartesian coordinates for H<sup>+</sup>-*N*-isopropylazetidide

| Atom | x        | y        | z        | Atom | X        | y        | z       |
|------|----------|----------|----------|------|----------|----------|---------|
| C    | 0.00000  | 0.00000  | 0.00000  | C    | 0.18394  | -0.13974 | 2.63613 |
| H    | 1.09570  | 0.00000  | 0.00000  | C    | 0.38553  | -1.59088 | 3.12200 |
| C    | -0.52780 | 1.43322  | 0.00000  | H    | 1.11263  | -2.19506 | 1.10814 |
| H    | -0.13709 | 2.02233  | 0.83466  | H    | -0.51361 | -2.86102 | 1.45160 |
| H    | -0.21601 | 1.92815  | -0.92321 | H    | 1.11263  | 0.39354  | 2.42722 |
| H    | -1.62312 | 1.45705  | 0.03111  | H    | -0.51361 | 0.50707  | 3.16788 |
| C    | -0.52780 | -0.84234 | -1.15956 | H    | 1.35406  | -1.81760 | 3.56692 |
| H    | -1.62312 | -0.88152 | -1.16055 | H    | -0.40685 | -1.93182 | 3.79107 |
| H    | -0.21601 | -0.38629 | -2.10258 | N    | -0.38061 | -0.66763 | 1.31019 |
| H    | -0.13709 | -1.86386 | -1.14564 | H    | -1.40388 | -0.69410 | 1.36214 |
| C    | 0.18394  | -2.05066 | 1.66238  |      |          |          |         |

Table S24. Calculated Cartesian coordinates for *N*-tbutylazetidione

| Atom | x        | y        | z        | Atom | X        | y        | z        |
|------|----------|----------|----------|------|----------|----------|----------|
| C    | 0.00000  | 0.00000  | 0.00000  | H    | -0.16083 | -0.73732 | -2.71520 |
| C    | 1.53883  | 0.00000  | 0.00000  | H    | 0.79868  | 0.74801  | -2.97048 |
| H    | 1.91914  | 1.02637  | 0.00000  | H    | -2.50377 | 0.09903  | -1.28962 |
| H    | 1.92518  | -0.51704 | 0.88484  | H    | -2.32491 | 1.86305  | -1.06984 |
| H    | 1.93662  | -0.51173 | -0.88361 | H    | -2.08862 | 0.46806  | -3.70725 |
| C    | -0.51524 | -1.45971 | 0.00757  | H    | -1.31831 | 2.04297  | -3.36521 |
| H    | -0.15954 | -2.01969 | -0.86389 | N    | -0.43691 | 0.77748  | -1.17423 |
| H    | -0.15984 | -1.98440 | 0.90109  | C    | -0.51790 | 0.73254  | 1.25030  |
| H    | -1.60958 | -1.50329 | 0.01612  | H    | -0.17462 | 0.23134  | 2.16160  |
| C    | -0.13846 | 0.35446  | -2.56082 | H    | -0.15772 | 1.76608  | 1.26194  |
| C    | -1.86535 | 0.97091  | -1.51006 | H    | -1.61329 | 0.75212  | 1.27471  |
| C    | -1.46305 | 1.02208  | -3.00417 |      |          |          |          |

Table S25. Calculated Cartesian coordinates for H<sup>+</sup>-*N*-tbutylazetidione

| Atom | x        | y        | z        | Atom | X        | y       | z        |
|------|----------|----------|----------|------|----------|---------|----------|
| C    | 0.00000  | 0.00000  | 0.00000  | H    | -2.46856 | 1.05034 | -0.78396 |
| C    | 1.53475  | 0.00000  | 0.00000  | H    | -2.32319 | 0.11320 | -2.30018 |
| H    | 1.94575  | 1.01421  | 0.00000  | H    | -0.05241 | 2.69298 | -0.74578 |
| H    | 1.89427  | -0.49886 | 0.90334  | H    | 0.79820  | 2.23530 | -2.25086 |
| H    | 1.94295  | -0.54693 | -0.85762 | H    | -2.07947 | 3.10816 | -2.13684 |
| C    | -0.56292 | -1.42739 | -0.03360 | H    | -1.40287 | 2.14395 | -3.46963 |
| H    | -0.18489 | -1.99518 | -0.89148 | N    | -0.42381 | 0.65421 | -1.33382 |
| H    | -0.25096 | -1.95825 | 0.86918  | H    | -0.01436 | 0.06897 | -2.06763 |
| H    | -1.65693 | -1.43726 | -0.05811 | C    | -0.55641 | 0.78972 | 1.18808  |
| C    | -1.89213 | 0.91237  | -1.69748 | H    | -0.17736 | 1.81416 | 1.23161  |
| C    | -0.11629 | 2.11970  | -1.66942 | H    | -1.64917 | 0.81152 | 1.20877  |
| C    | -1.48007 | 2.23226  | -2.38421 | H    | -0.23181 | 0.29233 | 2.10583  |

Table S26. Calculated Cartesian coordinates for *N*-methylpyrrolidine

| Atom | x        | y        | z        | Atom | X        | y       | z        |
|------|----------|----------|----------|------|----------|---------|----------|
| C    | 0.00000  | 0.00000  | 0.00000  | H    | 2.09651  | 1.84982 | -1.03930 |
| C    | 1.55847  | 0.00000  | 0.00000  | H    | -1.28981 | 1.71295 | 0.56780  |
| C    | 1.93761  | 1.49314  | 0.00000  | H    | -0.53792 | 1.84970 | -1.03967 |
| C    | -0.37934 | 1.49319  | -0.00019 | N    | 0.77896  | 2.14768 | 0.60814  |
| H    | -0.41946 | -0.52044 | -0.86611 | C    | 0.77916  | 3.59471 | 0.49785  |
| H    | -0.38414 | -0.49353 | 0.89743  | H    | -0.10671 | 4.00628 | 0.99241  |
| H    | 1.97793  | -0.52053 | -0.86606 | H    | 1.66473  | 4.00604 | 0.99317  |
| H    | 1.94255  | -0.49371 | 0.89737  | H    | 0.77959  | 3.94291 | -0.55503 |
| H    | 2.84778  | 1.71333  | 0.56833  |      |          |         |          |

Table S27. Calculated Cartesian coordinates for H<sup>+</sup>-*N*-methylpyrrolidine

| Atom | x        | y        | z        | Atom | X        | y       | z        |
|------|----------|----------|----------|------|----------|---------|----------|
| C    | 0.00000  | 0.00000  | 0.00000  | H    | 2.30763  | 1.82641 | -0.98430 |
| C    | 1.55690  | 0.00000  | 0.00000  | H    | -1.36186 | 1.76081 | 0.08107  |
| C    | 1.98102  | 1.48350  | 0.00000  | H    | -0.36457 | 1.65842 | -1.39245 |
| C    | -0.39927 | 1.44021  | -0.32158 | N    | 0.70861  | 2.25952 | 0.31644  |
| H    | -0.41919 | -0.69269 | -0.73214 | C    | 0.74076  | 3.70562 | -0.07595 |
| H    | -0.38972 | -0.29244 | 0.97991  | H    | -0.20151 | 4.17347 | 0.21219  |
| H    | 1.96042  | -0.49710 | -0.88432 | H    | 1.57233  | 4.19413 | 0.43366  |
| H    | 1.94931  | -0.52520 | 0.87308  | H    | 0.87533  | 3.76855 | -1.15636 |
| H    | 2.74263  | 1.74767  | 0.73560  | H    | 0.56757  | 2.21681 | 1.33092  |

Table S28. Calculated Cartesian coordinates for *N*-methylpiperidine

| Atom | x        | y        | z        | Atom | X        | y        | z        |
|------|----------|----------|----------|------|----------|----------|----------|
| C    | 1.90010  | -0.00001 | 0.24028  | H    | -0.85190 | 2.07924  | -0.21440 |
| C    | 1.15670  | -1.25922 | -0.22709 | H    | -0.38873 | 1.27349  | 1.29679  |
| C    | -0.31710 | -1.21156 | 0.18887  | H    | 1.21188  | 1.33551  | -1.32056 |
| C    | -0.31710 | 1.21157  | 0.18887  | H    | 1.62249  | 2.16160  | 0.18757  |
| C    | 1.15671  | 1.25922  | -0.22708 | H    | -0.38874 | -1.27347 | 1.29680  |
| H    | -0.85193 | -2.07923 | -0.21438 | N    | -0.97279 | 0.00000  | -0.30766 |
| H    | 1.21186  | -1.33552 | -1.32057 | C    | -2.39876 | 0.00000  | -0.01570 |
| H    | 1.62246  | -2.16161 | 0.18756  | H    | -2.86749 | 0.88631  | -0.45580 |
| H    | 1.96017  | -0.00001 | 1.33832  | H    | -2.86748 | -0.88632 | -0.45578 |
| H    | 2.93155  | -0.00001 | -0.13213 | H    | -2.61788 | 0.00001  | 1.07128  |

Table S29. Calculated Cartesian coordinates for H<sup>+</sup>-*N*-methylpiperidine

| Atom | x        | y        | z        | Atom | X        | y       | z        |
|------|----------|----------|----------|------|----------|---------|----------|
| C    | 0.00000  | 0.00000  | 0.00000  | H    | -0.24701 | 2.80392 | 0.26063  |
| C    | 1.53527  | 0.00000  | 0.00000  | H    | -0.31096 | 0.35050 | 2.12555  |
| C    | 2.10115  | 1.41853  | 0.00000  | H    | -1.63064 | 0.92277 | 1.12106  |
| C    | 0.03426  | 2.25248  | 1.16290  | H    | 1.81458  | 1.97208 | -0.89931 |
| C    | -0.54037 | 0.83747  | 1.16782  | N    | 1.55571  | 2.22104 | 1.17236  |
| H    | 3.19028  | 1.43279  | 0.08690  | C    | 2.14884  | 3.59976 | 1.23785  |
| H    | 1.91733  | -0.54857 | 0.87184  | H    | 1.76457  | 4.11065 | 2.12155  |
| H    | 1.93001  | -0.51387 | -0.88219 | H    | 3.23495  | 3.51737 | 1.29448  |
| H    | -0.37099 | 0.40538  | -0.95015 | H    | 1.86200  | 4.14406 | 0.33745  |
| H    | -0.37365 | -1.02511 | 0.07102  | H    | 1.83626  | 1.72585 | 2.02608  |
| H    | -0.27520 | 2.83099  | 2.03670  |      |          |         |          |



Table S30. Calculated Cartesian coordinates for *N*-methylaziridine + H<sub>3</sub>O<sup>+</sup>

| Atom | x        | y        | z        | Atom | X        | y        | z        |
|------|----------|----------|----------|------|----------|----------|----------|
| N    | -0.31610 | 0.17341  | -0.00044 | H    | -0.25254 | -1.58974 | 1.27503  |
| C    | -0.91042 | 1.53181  | 0.00016  | H    | -1.85646 | -0.68317 | 1.27344  |
| H    | -0.57743 | 2.05919  | 0.89549  | H    | 0.72394  | 0.15838  | -0.00138 |
| H    | -0.57816 | 2.05965  | -0.89516 | H    | -0.25508 | -1.58987 | -1.27588 |
| H    | -1.99827 | 1.45131  | 0.00057  | O    | 2.45867  | -0.02192 | -0.00022 |
| C    | -0.95216 | -0.95404 | -0.74102 | H    | 3.03765  | 0.01838  | 0.77386  |
| H    | -1.85898 | -0.68330 | -1.27120 | H    | 3.03840  | 0.01791  | -0.77378 |
| C    | -0.95070 | -0.95396 | 0.74150  |      |          |          |          |

Table S31. Calculated Cartesian coordinates for *N*-ethylaziridine + H<sub>3</sub>O<sup>+</sup>

| Atom | x        | y        | z        | Atom | x        | y        | z        |
|------|----------|----------|----------|------|----------|----------|----------|
| C    | 0.11399  | 1.40340  | 0.92182  | H    | 1.09295  | -0.66005 | -1.63385 |
| H    | 1.11080  | 1.59157  | 1.30630  | H    | 2.09442  | 0.38352  | -0.61113 |
| H    | -0.68177 | 1.35152  | 1.65669  | C    | 1.61334  | -1.54212 | 0.29222  |
| C    | -0.20468 | 1.78133  | -0.47610 | H    | 2.51109  | -2.03687 | -0.08793 |
| H    | -1.23114 | 1.99935  | -0.74998 | H    | 1.81314  | -1.23221 | 1.32228  |
| H    | 0.56363  | 2.23988  | -1.08940 | H    | 0.80382  | -2.27794 | 0.29333  |
| N    | 0.05471  | 0.35447  | -0.13523 | O    | -2.35779 | -1.06541 | -0.01815 |
| H    | -0.79713 | -0.23884 | -0.10342 | H    | -2.70870 | -1.56098 | 0.73493  |
| C    | 1.28689  | -0.35373 | -0.60207 | H    | -2.94908 | -1.25024 | -0.76122 |

Table S32. Calculated Cartesian coordinates for *N*-isopropylazidine + H<sub>3</sub>O<sup>+</sup>

| Atom | x        | y        | z        | Atom | X        | y        | z        |
|------|----------|----------|----------|------|----------|----------|----------|
| H    | -0.87434 | -0.39535 | -0.00012 | H    | 1.29584  | -0.11234 | -2.17598 |
| N    | -0.24169 | 0.42708  | 0.00000  | H    | 2.62955  | -0.88480 | -1.31302 |
| C    | -0.77117 | 1.60413  | -0.74159 | H    | 1.03490  | -1.64497 | -1.30774 |
| H    | -0.01467 | 2.17541  | -1.26887 | C    | 1.55601  | -0.68234 | 1.27907  |
| H    | -1.69705 | 1.42487  | -1.27696 | H    | 1.03543  | -1.64518 | 1.30764  |
| C    | -0.77126 | 1.60411  | 0.74153  | H    | 2.62972  | -0.88426 | 1.31321  |
| H    | -0.01472 | 2.17534  | 1.26881  | H    | 1.29553  | -0.11249 | 2.17601  |
| C    | 1.22814  | 0.08513  | 0.00002  | O    | -2.17359 | -1.62255 | 0.00001  |
| H    | 1.74484  | 1.05153  | 0.00002  | H    | -2.53731 | -2.07617 | 0.77314  |
| H    | -1.69718 | 1.42493  | 1.27685  | H    | -2.53590 | -2.07758 | -0.77296 |
| C    | 1.55593  | -0.68238 | -1.27904 |      |          |          |          |

Table S33. Calculated Cartesian coordinates for *N*-tertbutylaziridine + H<sub>3</sub>O<sup>+</sup>

| Atom | x        | y        | z        | Atom | X        | y        | z        |
|------|----------|----------|----------|------|----------|----------|----------|
| H    | -1.18841 | -0.17378 | -0.00017 | H    | 2.25038  | 1.13081  | -0.89233 |
| N    | -0.34632 | 0.42777  | -0.00006 | C    | 0.88654  | -1.25891 | -1.26997 |
| C    | -0.56274 | 1.69982  | -0.74181 | H    | 0.88912  | -0.64265 | -2.17445 |
| H    | 0.30655  | 2.07972  | -1.26414 | H    | 1.76381  | -1.90986 | -1.30756 |
| H    | -1.50363 | 1.74997  | -1.27859 | H    | -0.00092 | -1.89980 | -1.28135 |
| C    | -0.56286 | 1.69974  | 0.74177  | C    | 0.88643  | -1.25888 | 1.27001  |
| H    | 0.30637  | 2.07956  | 1.26426  | H    | 1.76361  | -1.90995 | 1.30760  |
| C    | 0.94561  | -0.39943 | 0.00001  | H    | 0.88912  | -0.64260 | 2.17448  |
| H    | -1.50383 | 1.74986  | 1.27843  | H    | -0.00112 | -1.89963 | 1.28142  |
| C    | 2.18273  | 0.50229  | 0.00005  | O    | -2.85332 | -0.89818 | -0.00003 |
| H    | 2.25022  | 1.13093  | 0.89236  | H    | -3.34541 | -1.21007 | -0.77227 |
| H    | 3.06666  | -0.14045 | 0.00018  | H    | -3.34597 | -1.20881 | 0.77235  |

Table S34. Calculated Cartesian coordinates for *N*-methylazetidinium + H<sub>3</sub>O<sup>+</sup>

| Atom | x        | y        | z        | Atom | X        | y        | z        |
|------|----------|----------|----------|------|----------|----------|----------|
| H    | 0.88858  | 0.01384  | 0.00083  | H    | -2.58831 | -1.30942 | 0.00141  |
| C    | -0.91805 | -0.25394 | -1.07130 | N    | -0.06488 | 0.42763  | -0.00030 |
| C    | -0.91900 | -0.25047 | 1.07224  | C    | 0.05781  | 1.90919  | -0.00295 |
| C    | -1.50440 | -1.19784 | 0.00175  | H    | 0.60325  | 2.22078  | 0.88979  |
| H    | -0.31756 | -0.67808 | -1.87660 | H    | 0.60552  | 2.21730  | -0.89549 |
| H    | -1.63091 | 0.46880  | -1.47196 | H    | -0.93868 | 2.35340  | -0.00493 |
| H    | -0.31899 | -0.67226 | 1.87910  | O    | 2.54204  | -0.67667 | 0.00097  |
| H    | -1.63222 | 0.47350  | 1.47005  | H    | 3.10550  | -0.83177 | 0.77178  |
| H    | -1.03868 | -2.18474 | 0.00368  | H    | 3.08216  | -0.89302 | -0.77178 |

Table S35. Calculated Cartesian coordinates for *N*-ethylazetidinium + H<sub>3</sub>O<sup>+</sup>

| Atom | x        | y        | z        | Atom | x       | Y        | z        |
|------|----------|----------|----------|------|---------|----------|----------|
| C    | -2.19637 | -0.15521 | -0.32556 | C    | 1.02564 | -1.07729 | 0.63731  |
| C    | -1.38371 | -0.14111 | 0.98776  | H    | 1.31952 | -0.72482 | 1.63082  |
| C    | -0.89696 | -0.55683 | -1.05796 | H    | 0.59979 | -2.07919 | 0.74307  |
| H    | -3.01552 | -0.87219 | -0.37558 | C    | 2.19971 | -1.05939 | -0.33300 |
| H    | -2.56194 | 0.83214  | -0.61248 | H    | 2.98455 | -1.71976 | 0.04503  |
| H    | -1.46515 | -1.05643 | 1.57637  | H    | 1.91508 | -1.42221 | -1.32537 |
| H    | -1.44720 | 0.73316  | 1.63603  | H    | 2.62584 | -0.05642 | -0.43049 |
| H    | -0.79678 | -1.62893 | -1.23606 | O    | 0.78716 | 2.53059  | -0.04377 |
| H    | -0.59822 | 0.00192  | -1.94496 | H    | 0.99981 | 3.01884  | -0.85127 |
| N    | -0.08540 | -0.17924 | 0.18244  | H    | 0.96989 | 3.13634  | 0.68793  |
| H    | 0.28101  | 0.78648  | 0.07873  |      |         |          |          |

Table S36. Calculated Cartesian coordinates for *N*-isoprpopylazetidide + H<sub>3</sub>O<sup>+</sup>

| Atom | x        | y        | z        | Atom | x        | y        | z        |
|------|----------|----------|----------|------|----------|----------|----------|
| C    | -1.23799 | -1.92576 | 0.34382  | H    | 1.08517  | 0.92514  | -1.41258 |
| C    | -0.36459 | -0.94902 | 1.16270  | C    | 2.36135  | -0.47811 | -0.39214 |
| C    | -0.68055 | -1.26574 | -0.93665 | H    | 2.20689  | -1.31505 | -1.07796 |
| H    | -1.01839 | -2.98560 | 0.47143  | H    | 3.26610  | 0.03946  | -0.72198 |
| H    | -2.30791 | -1.75852 | 0.47838  | H    | 2.56381  | -0.87120 | 0.60855  |
| H    | 0.58020  | -1.37447 | 1.49850  | C    | 1.42714  | 1.67985  | 0.58306  |
| H    | -0.82718 | -0.37751 | 1.96740  | H    | 2.34885  | 2.20753  | 0.32522  |
| H    | -0.84218 | 0.64685  | -0.11500 | H    | 0.60765  | 2.40406  | 0.54746  |
| H    | 0.14213  | -1.81034 | -1.39763 | H    | 1.53387  | 1.31549  | 1.61044  |
| H    | -1.38265 | -0.92473 | -1.69788 | O    | -2.24825 | 1.83059  | -0.25076 |
| N    | -0.13604 | -0.11116 | -0.09651 | H    | -2.55678 | 2.27736  | -1.05131 |
| C    | 1.21172  | 0.52684  | -0.39871 | H    | -2.76390 | 2.20658  | 0.47612  |

Table S37. Calculated Cartesian coordinates for *N*-tertbutylazetidinium + H<sub>3</sub>O<sup>+</sup>

| Atom | x        | y        | z        | Atom | x        | y        | z        |
|------|----------|----------|----------|------|----------|----------|----------|
| H    | -1.18841 | -0.17378 | -0.00017 | H    | 2.25038  | 1.13081  | -0.89233 |
| N    | -0.34632 | 0.42777  | -0.00006 | C    | 0.88654  | -1.25891 | -1.26997 |
| C    | -0.56274 | 1.69982  | -0.74181 | H    | 0.88912  | -0.64265 | -2.17445 |
| H    | 0.30655  | 2.07972  | -1.26414 | H    | 1.76381  | -1.90986 | -1.30756 |
| H    | -1.50363 | 1.74997  | -1.27859 | H    | -0.00092 | -1.89980 | -1.28135 |
| C    | -0.56286 | 1.69974  | 0.74177  | C    | 0.88643  | -1.25888 | 1.27001  |
| H    | 0.30637  | 2.07956  | 1.26426  | H    | 1.76361  | -1.90995 | 1.30760  |
| C    | 0.94561  | -0.39943 | 0.00001  | H    | 0.88912  | -0.64260 | 2.17448  |
| H    | -1.50383 | 1.74986  | 1.27843  | H    | -0.00112 | -1.89963 | 1.28142  |
| C    | 2.18273  | 0.50229  | 0.00005  | O    | -2.85332 | -0.89818 | -0.00003 |
| H    | 2.25022  | 1.13093  | 0.89236  | H    | -3.34541 | -1.21007 | -0.77227 |
| H    | 3.06666  | -0.14045 | 0.00018  | H    | -3.34597 | -1.20881 | 0.77235  |



**Table S38. Calculated Cartesian coordinates for *N*-methylpyrrolidine + H<sub>3</sub>O<sup>+</sup>**

| Atom | x        | y        | z        | Atom | x        | y        | z        |
|------|----------|----------|----------|------|----------|----------|----------|
| C    | -1.42958 | -0.95517 | 0.73766  | H    | -2.73390 | -0.04408 | -0.76150 |
| C    | -0.58932 | 0.21853  | 1.23088  | H    | -1.86671 | -1.45190 | -1.36281 |
| C    | -0.64234 | 0.36445  | -1.18846 | N    | 0.26164  | 0.55668  | 0.02579  |
| C    | -1.77882 | -0.57354 | -0.72049 | C    | 0.93322  | 1.88996  | 0.08571  |
| H    | -0.84354 | -1.87955 | 0.77583  | H    | 1.57363  | 1.92659  | 0.96832  |
| H    | -2.31622 | -1.10382 | 1.35727  | H    | 1.53485  | 2.02511  | -0.81420 |
| H    | 0.06409  | 0.00253  | 2.07823  | H    | 0.17295  | 2.67005  | 0.14651  |
| H    | -1.19877 | 1.09851  | 1.45647  | O    | 2.39471  | -1.32223 | -0.13093 |
| H    | 1.01151  | -0.15982 | -0.02833 | H    | 3.29900  | -1.17162 | 0.17777  |
| H    | -1.00610 | 1.35009  | -1.48451 | H    | 2.39077  | -2.20934 | -0.51634 |
| H    | -0.02967 | -0.03701 | -1.99750 |      |          |          |          |

Table S39. Calculated Cartesian coordinates for *N*-methylpiperidine + H<sub>3</sub>O<sup>+</sup>

| Atom | x        | y        | z        | Atom | X        | y       | z        |
|------|----------|----------|----------|------|----------|---------|----------|
| C    | 0.00000  | 0.00000  | 0.00000  | H    | -0.29943 | 0.34718 | 2.12543  |
| C    | 1.53445  | 0.00000  | 0.00000  | H    | -1.62672 | 0.91870 | 1.12878  |
| C    | 2.09933  | 1.41945  | 0.00000  | H    | 1.82411  | 1.96130 | -0.91057 |
| C    | 0.03881  | 2.25010  | 1.16478  | N    | 1.55447  | 2.23020 | 1.15896  |
| C    | -0.53610 | 0.83472  | 1.17062  | C    | 2.12210  | 3.61598 | 1.17567  |
| H    | 3.18802  | 1.42772  | 0.09344  | H    | 1.75298  | 4.14044 | 2.05807  |
| H    | 1.91499  | -0.54540 | 0.87354  | H    | 3.21071  | 3.55388 | 1.20691  |
| H    | 1.92926  | -0.51494 | -0.88160 | H    | 1.80692  | 4.14218 | 0.27328  |
| H    | -0.37129 | 0.40934  | -0.94854 | H    | 1.86645  | 1.77161 | 2.03791  |
| H    | -0.37521 | -1.02510 | 0.06729  | O    | 2.52669  | 1.16698 | 3.63201  |
| H    | -0.26585 | 2.82067  | 2.04553  | H    | 3.07231  | 1.64711 | 4.27040  |
| H    | -0.26461 | 2.80298  | 0.26997  | H    | 2.36969  | 0.29633 | 4.02287  |

Table S40. Calculated Cartesian coordinates for (N-methylazirdine)<sub>2</sub>H<sup>+</sup>

| Atom | x        | y        | z        | Atom | X        | y        | z        |
|------|----------|----------|----------|------|----------|----------|----------|
| N    | 1.36097  | 0.14111  | -0.06318 | C    | -2.12602 | 0.39109  | -1.05880 |
| C    | 1.87867  | 1.45559  | -0.50191 | H    | -3.01365 | 0.99208  | -0.88001 |
| H    | 1.50289  | 1.66679  | -1.50479 | H    | -1.56107 | 0.65831  | -1.94738 |
| H    | 1.53259  | 2.22116  | 0.19507  | C    | -2.11293 | -1.01038 | -0.56871 |
| H    | 2.97039  | 1.44315  | -0.51695 | H    | -2.99166 | -1.38267 | -0.04869 |
| C    | 2.09924  | -0.65031 | 0.95486  | C    | -1.85085 | 0.47839  | 1.43249  |
| H    | 3.00059  | -0.18075 | 1.33491  | H    | -1.49336 | 1.49158  | 1.63682  |
| C    | 2.06323  | -1.10824 | -0.45576 | H    | -2.94732 | 0.48676  | 1.45085  |
| H    | 1.41082  | -1.92898 | -0.73387 | H    | -1.49646 | -0.19344 | 2.21921  |
| H    | 2.93876  | -0.96412 | -1.08023 | H    | 1.47072  | -1.13981 | 1.69140  |
| H    | 0.25346  | 0.07616  | -0.00059 | H    | -1.54103 | -1.76470 | -1.10117 |
| N    | -1.32435 | 0.02770  | 0.13067  |      |          |          |          |

Table S41. Calculated Cartesian coordinates for (N-ethylaziridine)<sub>2</sub>H<sup>+</sup>

| Atom | x        | y        | z        | Atom | X        | y        | z        |
|------|----------|----------|----------|------|----------|----------|----------|
| N    | -1.32350 | -0.37483 | 0.13477  | C    | 2.07226  | -0.06549 | -1.02463 |
| C    | -2.10422 | 0.14106  | -1.02648 | H    | 3.08698  | 0.35331  | -0.97293 |
| H    | -1.61050 | -0.23930 | -1.92563 | H    | -0.68355 | -2.28981 | 0.93700  |
| C    | -1.57714 | -1.73896 | 0.66320  | H    | 1.52630  | 0.13322  | 2.32804  |
| H    | -2.33925 | -2.30166 | 0.13421  | H    | -3.10276 | -0.30440 | -0.97860 |
| C    | -1.97810 | -0.55111 | 1.45625  | C    | -2.17447 | 1.66307  | -1.02441 |
| H    | -1.38075 | -0.24718 | 2.30900  | H    | -2.74829 | 1.99720  | -1.89307 |
| H    | -3.02541 | -0.26873 | 1.48807  | H    | -2.67461 | 2.04312  | -0.12846 |
| H    | -0.26395 | -0.06489 | 0.15958  | H    | -1.17973 | 2.11336  | -1.08937 |
| N    | 1.29364  | 0.35804  | 0.16424  | H    | 1.58846  | 0.37498  | -1.90390 |
| C    | 1.62216  | 1.68710  | 0.72128  | C    | 2.13704  | -1.58486 | -1.14475 |
| H    | 2.37725  | 2.26386  | 0.19343  | H    | 1.14024  | -2.02585 | -1.25456 |
| H    | 0.78104  | 2.26548  | 1.09323  | H    | 2.71961  | -1.86560 | -2.02675 |
| C    | 2.04906  | 0.45535  | 1.43214  | H    | 2.61898  | -2.03430 | -0.27053 |
| H    | 3.09939  | 0.17783  | 1.39249  |      |          |          |          |

Table S42. Calculated Cartesian coordinates for (*N*-isopropylaziridine)<sub>2</sub>H<sup>+</sup>

| Atom | x        | y        | z        | Atom | x        | y        | z        |
|------|----------|----------|----------|------|----------|----------|----------|
| N    | 1.24085  | 0.66939  | -0.16698 | H    | -0.21721 | -2.49573 | 0.44506  |
| C    | 2.46955  | -0.10348 | 0.23031  | C    | 2.68441  | -1.26007 | -0.74454 |
| H    | 3.30050  | 0.60582  | 0.13695  | H    | 3.61738  | -1.77331 | -0.49716 |
| C    | 1.31249  | 1.67993  | -1.25287 | H    | 1.87667  | -1.99600 | -0.68100 |
| H    | 2.28578  | 1.77949  | -1.72183 | H    | 2.76057  | -0.91212 | -1.77913 |
| C    | 1.14297  | 2.11534  | 0.15446  | C    | 2.33896  | -0.54279 | 1.68777  |
| H    | 0.16939  | 2.44185  | 0.50244  | H    | 3.25600  | -1.05113 | 1.99705  |
| H    | 1.99707  | 2.52080  | 0.68658  | H    | 2.18789  | 0.30977  | 2.35649  |
| H    | 0.29178  | 0.13194  | -0.12553 | H    | 1.50743  | -1.24149 | 1.82235  |
| N    | -1.20009 | -0.64484 | -0.18065 | C    | -2.69279 | 1.25604  | -0.70672 |
| C    | -1.34821 | -1.62349 | -1.27862 | H    | -2.74715 | 0.94168  | -1.75376 |
| H    | -2.33465 | -1.71302 | -1.72681 | H    | -3.63981 | 1.74194  | -0.45563 |
| H    | -0.52121 | -1.67842 | -1.98138 | H    | -1.90444 | 2.01253  | -0.61354 |
| C    | -1.17104 | -2.09106 | 0.11889  | C    | -2.34567 | 0.48007  | 1.69487  |
| H    | -2.03613 | -2.49961 | 0.63517  | H    | -1.53234 | 1.19711  | 1.85571  |
| C    | -2.44515 | 0.06929  | 0.22542  | H    | -3.27560 | 0.95634  | 2.01815  |
| H    | -3.28822 | -0.63110 | 0.11833  | H    | -2.16981 | -0.38481 | 2.34184  |
| H    | 0.45777  | 1.68698  | -1.92087 |      |          |          |          |

Table S43. Calculated Cartesian coordinates for (N-tertbutylaziridine)<sub>2</sub>H<sup>+</sup>

| Atom | x        | y        | z        | Atom | x        | y        | z        |
|------|----------|----------|----------|------|----------|----------|----------|
| N    | -1.33806 | 0.54073  | -0.22340 | C    | -2.03930 | -0.81524 | 1.69027  |
| C    | -2.45527 | -0.37856 | 0.27883  | H    | -2.79296 | -1.49422 | 2.09766  |
| C    | -1.34418 | 2.01856  | -0.06443 | H    | -1.08050 | -1.34088 | 1.68780  |
| H    | -2.22774 | 2.43198  | 0.40464  | H    | -1.96265 | 0.04293  | 2.36522  |
| C    | -1.46821 | 1.41880  | -1.41447 | C    | 3.80631  | -0.37472 | 0.31055  |
| H    | -0.60725 | 1.40279  | -2.07421 | H    | 4.10866  | -0.76298 | -0.66650 |
| H    | -2.43752 | 1.41146  | -1.89818 | H    | 4.56936  | 0.34791  | 0.61270  |
| H    | -0.34925 | 0.11614  | -0.14621 | H    | 3.83635  | -1.18990 | 1.03856  |
| N    | 1.29704  | -0.51054 | -0.23866 | C    | 2.05772  | 0.74912  | 1.70788  |
| C    | 1.35693  | -1.97934 | -0.10864 | H    | 1.94191  | -0.12908 | 2.35150  |
| H    | 2.24526  | -2.41603 | 0.33415  | H    | 2.83615  | 1.38207  | 2.14360  |
| H    | 0.43040  | -2.47011 | 0.17547  | H    | 1.11914  | 1.31278  | 1.73034  |
| C    | 1.49271  | -1.34069 | -1.44258 | C    | -2.51365 | -1.56277 | -0.69595 |
| H    | 2.47269  | -1.34304 | -1.90975 | H    | -1.55290 | -2.07953 | -0.76933 |
| C    | 2.43894  | 0.33625  | 0.27760  | H    | -3.25191 | -2.28757 | -0.34335 |
| H    | -0.39820 | 2.44168  | 0.25259  | H    | -2.81355 | -1.24357 | -1.69902 |
| H    | 0.66151  | -1.35448 | -2.14361 | C    | 2.53492  | 1.56202  | -0.64478 |
| C    | -3.80716 | 0.34428  | 0.32170  | H    | 3.29141  | 2.25939  | -0.27449 |
| H    | -4.56846 | -0.38358 | 0.61370  | H    | 2.81710  | 1.27368  | -1.66261 |
| H    | -3.83319 | 1.14486  | 1.06566  | H    | 1.58574  | 2.10569  | -0.69765 |
| H    | -4.11113 | 0.74399  | -0.65016 |      |          |          |          |

Table S44. Calculated Cartesian coordinates for (N-methylazetidine)<sub>2</sub>H<sup>+</sup>

| Atom | x        | y        | z        | Atom | x        | y        | z        |
|------|----------|----------|----------|------|----------|----------|----------|
| C    | 2.71418  | 1.05998  | 0.00050  | H    | -2.82656 | 0.59757  | -1.48825 |
| C    | 2.13545  | 0.09386  | -1.05820 | H    | -1.52040 | -0.56177 | 1.86894  |
| C    | 2.13531  | 0.09314  | 1.05848  | H    | -2.82602 | 0.59824  | 1.48853  |
| H    | 3.79562  | 1.19677  | 0.00062  | H    | -2.29142 | -2.05659 | 0.00065  |
| H    | 2.23344  | 2.04130  | 0.00080  | H    | -3.81586 | -1.14237 | 0.00071  |
| H    | 2.88018  | -0.61812 | -1.43415 | N    | -1.27000 | 0.54760  | -0.00014 |
| H    | 1.58713  | 0.51287  | -1.90784 | C    | 1.17861  | -1.99695 | -0.00065 |
| H    | -0.25172 | 0.11894  | -0.00019 | H    | 0.64006  | -2.33851 | 0.88902  |
| H    | 2.87999  | -0.61909 | 1.43404  | H    | 0.64049  | -2.33789 | -0.89081 |
| H    | 1.58688  | 0.51160  | 1.90832  | H    | 2.17365  | -2.46340 | -0.00057 |
| N    | 1.26500  | -0.53019 | -0.00013 | C    | -1.17375 | 2.02631  | -0.00053 |
| C    | -2.12101 | -0.12336 | -1.07004 | H    | -0.63326 | 2.34976  | 0.89155  |
| C    | -2.12063 | -0.12287 | 1.07039  | H    | -0.63399 | 2.34931  | -0.89322 |
| C    | -2.72946 | -1.05710 | 0.00049  | H    | -2.17438 | 2.46405  | -0.00023 |
| H    | -1.52109 | -0.56262 | -1.86863 |      |          |          |          |

Table S45. Calculated Cartesian coordinates for (N-ethylazetidine)<sub>2</sub>H<sup>+</sup>

| Atom | x        | y        | z        | Atom | x        | y        | z        |
|------|----------|----------|----------|------|----------|----------|----------|
| C    | 2.19459  | -1.85803 | 0.41725  | H    | -1.64186 | 2.67539  | -0.50595 |
| C    | 2.12484  | -0.44810 | 1.04510  | H    | -3.32841 | 2.26407  | -0.13183 |
| C    | 1.89855  | -1.16224 | -0.92961 | N    | -1.40542 | -0.07227 | 0.17689  |
| H    | 3.14417  | -2.38747 | 0.49929  | C    | 1.90964  | 1.34365  | -0.73402 |
| H    | 1.39221  | -2.52025 | 0.75261  | H    | 2.99424  | 1.27174  | -0.91435 |
| H    | 3.11648  | 0.00751  | 1.15961  | C    | -1.84899 | -1.43156 | 0.62365  |
| H    | 1.56718  | -0.31731 | 1.97741  | H    | -1.29265 | -1.65450 | 1.53943  |
| H    | -0.33279 | -0.04799 | 0.01808  | H    | -2.90774 | -1.34714 | 0.88761  |
| H    | 2.81195  | -0.95265 | -1.50021 | C    | -1.64191 | -2.50843 | -0.43400 |
| H    | 1.16062  | -1.60477 | -1.60590 | H    | -2.01036 | -3.46100 | -0.04350 |
| N    | 1.42333  | 0.05843  | -0.18932 | H    | -2.19967 | -2.29414 | -1.35051 |
| C    | -1.81609 | 1.10585  | 1.05505  | H    | -0.58800 | -2.63969 | -0.68844 |
| C    | -2.13858 | 0.56948  | -0.99770 | H    | 1.43658  | 1.49006  | -1.71284 |
| C    | -2.31192 | 1.87478  | -0.18957 | C    | 1.63297  | 2.53415  | 0.17986  |
| H    | -0.97404 | 1.51598  | 1.61329  | H    | 2.08381  | 2.39650  | 1.16802  |
| H    | -2.60506 | 0.79776  | 1.74325  | H    | 2.06528  | 3.44114  | -0.25221 |
| H    | -1.52907 | 0.59887  | -1.90153 | H    | 0.56184  | 2.71405  | 0.31369  |
| H    | -3.06862 | 0.03341  | -1.19410 |      |          |          |          |



Table S46. Calculated Cartesian coordinates for (N-isopropylazetidide)<sub>2</sub>H<sup>+</sup>

| Atom | x        | y       | z        | Atom | X        | y        | z        |
|------|----------|---------|----------|------|----------|----------|----------|
| C    | 1.89236  | 2.09720 | 0.88752  | C    | 1.96108  | -1.19273 | -0.24553 |
| C    | 1.99596  | 1.38026 | -0.47794 | H    | 1.43994  | -1.91489 | 0.39869  |
| C    | 1.72363  | 0.69186 | 1.50859  | C    | -1.95528 | -1.22960 | 0.25464  |
| H    | 2.76275  | 2.67145 | 1.20635  | H    | -1.40250 | -1.92753 | -0.38465 |
| H    | 1.00332  | 2.72610 | 0.98229  | C    | 3.47155  | -1.38030 | -0.02565 |
| H    | 3.03398  | 1.24535 | -0.79889 | H    | 3.77311  | -1.21433 | 1.01201  |
| H    | 1.42093  | 1.77886 | -1.31957 | H    | 3.74430  | -2.40981 | -0.27580 |
| H    | -0.34107 | 0.11701 | -0.01414 | H    | 4.06722  | -0.72346 | -0.66755 |
| H    | 2.65953  | 0.30556 | 1.92271  | C    | 1.59222  | -1.48219 | -1.70533 |
| H    | 0.92975  | 0.53970 | 2.24751  | H    | 1.92858  | -2.48212 | -1.99239 |
| N    | 1.41377  | 0.14027 | 0.14497  | H    | 0.51112  | -1.43738 | -1.87502 |
| C    | -1.97749 | 1.40018 | 0.49243  | H    | 2.07376  | -0.76840 | -2.38306 |
| C    | -1.70283 | 0.72058 | -1.52099 | C    | -1.59769 | -1.48765 | 1.72006  |
| C    | -1.92034 | 2.10862 | -0.87892 | H    | -2.12930 | -0.80181 | 2.38824  |
| H    | -1.35060 | 1.77500 | 1.30149  | H    | -1.89365 | -2.50410 | 1.99164  |
| H    | -2.98985 | 1.22646 | 0.85650  | H    | -0.52416 | -1.39450 | 1.90403  |
| H    | -0.86531 | 0.58657 | -2.20598 | C    | -3.45230 | -1.39401 | -0.00888 |
| H    | -2.60516 | 0.28434 | -1.94615 | H    | -3.72240 | -1.26081 | -1.05937 |
| H    | -1.06092 | 2.77278 | -0.98520 | H    | -3.73682 | -2.41396 | 0.26359  |
| H    | -2.82284 | 2.63994 | -1.18105 | H    | -4.05994 | -0.71837 | 0.60087  |
| N    | -1.41789 | 0.13243 | -0.14314 |      |          |          |          |

Table S47. Calculated Cartesian coordinates for (N-tertbutylazetidide)<sub>2</sub>H<sup>+</sup>

| Atom | x        | y        | z        | Atom | X        | y        | z        |
|------|----------|----------|----------|------|----------|----------|----------|
| C    | 1.37658  | -2.06758 | -1.52997 | H    | 4.31005  | -0.03798 | -0.42239 |
| C    | 1.54566  | -1.86111 | -0.00831 | H    | 4.49986  | 0.74961  | 1.13857  |
| C    | 1.80716  | -0.59164 | -1.67552 | H    | 4.01572  | -0.93878 | 1.07705  |
| H    | 2.01645  | -2.81580 | -1.99919 | C    | 1.90071  | 0.52251  | 2.02908  |
| H    | 0.34198  | -2.24897 | -1.83292 | H    | 2.53838  | 1.15331  | 2.65528  |
| H    | 2.51936  | -2.21583 | 0.34411  | H    | 0.88135  | 0.91843  | 2.08669  |
| H    | 0.77618  | -2.25290 | 0.66461  | H    | 1.90345  | -0.48134 | 2.46745  |
| H    | -0.50028 | 0.06598  | -0.10069 | C    | -1.90739 | -0.61290 | 2.02523  |
| H    | 2.87406  | -0.49989 | -1.90716 | H    | -1.96416 | 0.36899  | 2.50598  |
| H    | 1.25245  | 0.05300  | -2.36501 | H    | -2.52664 | -1.29858 | 2.60942  |
| N    | 1.49993  | -0.37386 | -0.22082 | H    | -0.87464 | -0.96797 | 2.07743  |
| C    | -1.53155 | 1.89218  | 0.09002  | C    | -3.87998 | -0.08478 | 0.54641  |
| C    | -1.75840 | 0.68875  | -1.66973 | H    | -4.27686 | 0.00377  | -0.46864 |
| C    | -1.44168 | 2.17909  | -1.42379 | H    | -4.49538 | -0.82601 | 1.06288  |
| H    | -0.70920 | 2.20786  | 0.73041  | H    | -4.02567 | 0.86453  | 1.06789  |
| H    | -2.48281 | 2.17243  | 0.53793  | C    | -2.30967 | -1.94363 | -0.09625 |
| H    | -1.10422 | 0.11646  | -2.32594 | H    | -1.28259 | -2.31590 | -0.09170 |
| H    | -2.80033 | 0.49318  | -1.91846 | H    | -2.92408 | -2.66430 | 0.44933  |
| H    | -0.44053 | 2.46613  | -1.74893 | H    | -2.67188 | -1.92134 | -1.12866 |
| H    | -2.16641 | 2.89172  | -1.81786 | C    | 2.36131  | 1.91663  | -0.02444 |
| N    | -1.50303 | 0.38946  | -0.19208 | H    | 1.33897  | 2.30680  | -0.03899 |
| C    | 2.41853  | 0.50477  | 0.58194  | H    | 2.97105  | 2.60740  | 0.56470  |
| C    | -2.42419 | -0.57121 | 0.58102  | H    | 2.74704  | 1.93190  | -1.04888 |
| C    | 3.88974  | 0.02974  | 0.58530  |      |          |          |          |

Table S48. Calculated Cartesian coordinates for (N-methylpyrrolidine)<sub>2</sub>H<sup>+</sup>

| Atom | x       | y        | z        | Atom | x       | Y        | z        |
|------|---------|----------|----------|------|---------|----------|----------|
| C    | 2.42544 | 0.60636  | 1.25520  | C    | 1.70375 | 0.84458  | 1.04448  |
| C    | 2.28407 | -0.76615 | 0.58611  | C    | 2.29400 | -0.79446 | -0.50827 |
| C    | 1.69302 | 0.81532  | -1.09194 | C    | 2.10418 | 1.62820  | -0.21928 |
| C    | 2.12188 | 1.64326  | 0.13294  | H    | 0.89463 | 1.30731  | 1.61850  |
| H    | 1.71348 | 0.70843  | 2.07867  | H    | 2.56551 | 0.73172  | 1.72014  |
| H    | 3.42443 | 0.72861  | 1.67823  | C    | 2.46578 | 0.53234  | -1.26545 |
| H    | 1.90765 | -1.55744 | 1.23701  | H    | 3.24138 | -1.09702 | -0.03547 |
| H    | 3.22214 | -1.10023 | 0.13223  | H    | 1.95877 | -1.62692 | -1.13486 |
| H    | 0.29875 | -0.46012 | -0.11069 | H    | 2.94195 | 2.29789  | -0.01314 |
| H    | 2.52196 | 0.65112  | -1.78634 | H    | 1.28132 | 2.25566  | -0.57578 |
| H    | 0.84858 | 1.22683  | -1.64808 | H    | 3.48309 | 0.63893  | -1.64825 |
| H    | 2.99468 | 2.25219  | -0.11113 | H    | 1.79750 | 0.58182  | -2.13165 |
| H    | 1.32894 | 2.32858  | 0.44090  | N    | 1.28845 | -0.49279 | 0.54466  |
| N    | 1.30433 | -0.53189 | -0.53515 | C    | 1.26773 | -1.50906 | 1.61046  |
| C    | 1.27399 | -1.62002 | -1.55228 | H    | 0.98144 | -2.48115 | 1.19758  |
| H    | 0.97532 | -2.55265 | -1.07104 | H    | 0.54595 | -1.22769 | 2.38303  |
| H    | 0.55410 | -1.36310 | -2.33084 | H    | 2.25353 | -1.61615 | 2.08622  |
| H    | 2.26610 | -1.73613 | -1.99361 |      |         |          |          |

Table S49. Calculated Cartesian coordinates for (N-methylpiperidine)<sub>2</sub>H<sup>+</sup>

| Atom | x       | y        | z        | Atom | x        | Y        | z        |
|------|---------|----------|----------|------|----------|----------|----------|
| C    | 3.91013 | -1.00963 | -0.34943 | C    | -1.72646 | -0.86902 | -0.91485 |
| C    | 3.56136 | 0.32849  | -1.01841 | C    | -2.04324 | 0.51397  | 1.07882  |
| C    | 2.04829 | 0.53498  | -1.09667 | C    | -3.23814 | -1.10970 | -1.03859 |
| C    | 1.71848 | -0.90405 | 0.91135  | H    | -1.28533 | -1.67935 | -0.31884 |
| C    | 3.22676 | -1.13000 | 1.02095  | H    | -1.24479 | -0.88416 | -1.89879 |
| H    | 1.78608 | 1.51576  | -1.50107 | C    | -3.56527 | 0.31681  | 1.02310  |
| H    | 4.03141 | 1.15932  | -0.47869 | H    | -1.60694 | -0.26129 | 1.72369  |
| H    | 3.95560 | 0.36740  | -2.03911 | H    | -1.79070 | 1.48645  | 1.51573  |
| H    | 3.58625 | -1.83746 | -0.99441 | C    | -3.92060 | -1.00984 | 0.33445  |
| H    | 4.99430 | -1.10451 | -0.23960 | H    | -3.39919 | -2.09852 | -1.48229 |
| H    | 1.22695 | -0.91398 | 1.88744  | H    | -3.68057 | -0.38495 | -1.73308 |
| H    | 1.25994 | -1.68079 | 0.29134  | H    | -3.95842 | 0.34174  | 2.04551  |
| H    | 3.66785 | -0.42094 | 1.73177  | H    | -4.03492 | 1.15416  | 0.49255  |
| H    | 3.38368 | -2.12597 | 1.44786  | H    | -5.00582 | -1.10692 | 0.22954  |
| H    | 1.59013 | -0.22937 | -1.73262 | H    | -3.59165 | -1.84741 | 0.96601  |
| N    | 1.37022 | 0.41292  | 0.25079  | C    | -1.63044 | 1.58735  | -1.10204 |
| C    | 1.62433 | 1.58986  | 1.13643  | H    | -1.29750 | 2.49487  | -0.58917 |
| H    | 1.29052 | 2.49293  | 0.62310  | H    | -1.07193 | 1.48846  | -2.03763 |
| H    | 1.05550 | 1.46351  | 2.05881  | H    | -2.68899 | 1.71376  | -1.35378 |
| H    | 2.68358 | 1.67909  | 1.37286  | N    | -1.36068 | 0.41327  | -0.24429 |
| H    | 0.28700 | 0.39947  | 0.05671  | N    | -1.36068 | 0.41327  | -0.24429 |
